# Supplementary material for: DNA Barcoding Reveals High Cryptic Diversity of the Freshwater Halfbeak Genus Hemirhamphodon from Sundaland
Source: PLoS One. 2016 Sep 22;11(9):e0163596. doi: 10.1371/journal.pone.0163596 (PMC5033453; doi:10.1371/journal.pone.0163596)
Supplement: S1 Table — (XLSX) [file pone.0163596.s001.xlsx]

## Sheet: Sheet1
Sample Lable	Species	Country	State/Province	Latitude	Longitude	Institution Storing
KWK02	H. pogonognathus	Malaysia	Perlis	N: 6° 40' 39.2''	E: 100° 11' 5.1''	Universiti Sains Malaysia
KWK03	H. pogonognathus	Malaysia	Perlis	N: 6° 40' 39.2''	E: 100° 11' 5.1''	Universiti Sains Malaysia
KWK04	H. pogonognathus	Malaysia	Perlis	N: 6° 40' 39.2''	E: 100° 11' 5.1''	Universiti Sains Malaysia
KWK05	H. pogonognathus	Malaysia	Perlis	N: 6° 40' 39.2''	E: 100° 11' 5.1''	Universiti Sains Malaysia
KWK07	H. pogonognathus	Malaysia	Perlis	N: 6° 40' 39.2''	E: 100° 11' 5.1''	Universiti Sains Malaysia
TE01	H. pogonognathus	Malaysia	Kedah	N: 5° 56' 17.5''	E: 100° 26' 32.5''	Universiti Sains Malaysia
TE02	H. pogonognathus	Malaysia	Kedah	N: 5° 56' 17.5''	E: 100° 26' 32.5''	Universiti Sains Malaysia
TE03	H. pogonognathus	Malaysia	Kedah	N: 5° 56' 17.5''	E: 100° 26' 32.5''	Universiti Sains Malaysia
TE04	H. pogonognathus	Malaysia	Kedah	N: 5° 56' 17.5''	E: 100° 26' 32.5''	Universiti Sains Malaysia
TE05	H. pogonognathus	Malaysia	Kedah	N: 5° 56' 17.5''	E: 100° 26' 32.5''	Universiti Sains Malaysia
TB01	H. pogonognathus	Malaysia	Penang	N: 5° 26' 56.3''	E: 100° 12' 53.9''	Universiti Sains Malaysia
TB02	H. pogonognathus	Malaysia	Penang	N: 5° 26' 56.3''	E: 100° 12' 53.9''	Universiti Sains Malaysia
TB03	H. pogonognathus	Malaysia	Penang	N: 5° 26' 56.3''	E: 100° 12' 53.9''	Universiti Sains Malaysia
TB04	H. pogonognathus	Malaysia	Penang	N: 5° 26' 56.3''	E: 100° 12' 53.9''	Universiti Sains Malaysia
TB05	H. pogonognathus	Malaysia	Penang	N: 5° 26' 56.3''	E: 100° 12' 53.9''	Universiti Sains Malaysia
BP01	H. pogonognathus	Malaysia	Penang	N: 5° 9' 42.8''	E: 100° 32' 50.4''	Universiti Sains Malaysia
BP02	H. pogonognathus	Malaysia	Penang	N: 5° 9' 42.8''	E: 100° 32' 50.4''	Universiti Sains Malaysia
BP03	H. pogonognathus	Malaysia	Penang	N: 5° 9' 42.8''	E: 100° 32' 50.4''	Universiti Sains Malaysia
BP05	H. pogonognathus	Malaysia	Penang	N: 5° 9' 42.8''	E: 100° 32' 50.4''	Universiti Sains Malaysia
BP07	H. pogonognathus	Malaysia	Penang	N: 5° 9' 42.8''	E: 100° 32' 50.4''	Universiti Sains Malaysia
PTG01	H. pogonognathus	Malaysia	Perak	N: 5° 4' 46.4''	E: 100° 43' 20.1''	Universiti Sains Malaysia
PTG02	H. pogonognathus	Malaysia	Perak	N: 5° 4' 46.4''	E: 100° 43' 20.1''	Universiti Sains Malaysia
PTG04	H. pogonognathus	Malaysia	Perak	N: 5° 4' 46.4''	E: 100° 43' 20.1''	Universiti Sains Malaysia
PTG05	H. pogonognathus	Malaysia	Perak	N: 5° 4' 46.4''	E: 100° 43' 20.1''	Universiti Sains Malaysia
PTG06	H. pogonognathus	Malaysia	Perak	N: 5° 4' 46.4''	E: 100° 43' 20.1''	Universiti Sains Malaysia
SK01	H. pogonognathus	Malaysia	Perak	N: 4° 1' 5.7''	E: 101° 21' 57.5''	Universiti Sains Malaysia
SK02	H. pogonognathus	Malaysia	Perak	N: 4° 1' 5.7''	E: 101° 21' 57.5''	Universiti Sains Malaysia
SK03	H. pogonognathus	Malaysia	Perak	N: 4° 1' 5.7''	E: 101° 21' 57.5''	Universiti Sains Malaysia
SK04	H. pogonognathus	Malaysia	Perak	N: 4° 1' 5.7''	E: 101° 21' 57.5''	Universiti Sains Malaysia
SK05	H. pogonognathus	Malaysia	Perak	N: 4° 1' 5.7''	E: 101° 21' 57.5''	Universiti Sains Malaysia
PJG01	H. pogonognathus	Malaysia	Selangor	N: 3° 39' 12.4''	E: 101° 18' 1.9''	Universiti Sains Malaysia
PJG02	H. pogonognathus	Malaysia	Selangor	N: 3° 39' 12.4''	E: 101° 18' 1.9''	Universiti Sains Malaysia
PJG03	H. pogonognathus	Malaysia	Selangor	N: 3° 39' 12.4''	E: 101° 18' 1.9''	Universiti Sains Malaysia
PJG04	H. pogonognathus	Malaysia	Selangor	N: 3° 39' 12.4''	E: 101° 18' 1.9''	Universiti Sains Malaysia
PJG05	H. pogonognathus	Malaysia	Selangor	N: 3° 39' 12.4''	E: 101° 18' 1.9''	Universiti Sains Malaysia
DM01	H. pogonognathus	Malaysia	Selangor	N: 3° 11' 4.3''	E: 101° 35' 30''	Universiti Sains Malaysia
DM02	H. pogonognathus	Malaysia	Selangor	N: 3° 11' 4.3''	E: 101° 35' 30''	Universiti Sains Malaysia
DM03	H. pogonognathus	Malaysia	Selangor	N: 3° 11' 4.3''	E: 101° 35' 30''	Universiti Sains Malaysia
DM04	H. pogonognathus	Malaysia	Selangor	N: 3° 11' 4.3''	E: 101° 35' 30''	Universiti Sains Malaysia
DM05	H. pogonognathus	Malaysia	Selangor	N: 3° 11' 4.3''	E: 101° 35' 30''	Universiti Sains Malaysia
SU01	H. pogonognathus	Malaysia	N. Sembilan	N: 2° 54' 54''	E: 102° 15' 35.1''	Universiti Sains Malaysia
SU02	H. pogonognathus	Malaysia	N. Sembilan	N: 2° 54' 54''	E: 102° 15' 35.1''	Universiti Sains Malaysia
SU03	H. pogonognathus	Malaysia	N. Sembilan	N: 2° 54' 54''	E: 102° 15' 35.1''	Universiti Sains Malaysia
SU04	H. pogonognathus	Malaysia	N. Sembilan	N: 2° 54' 54''	E: 102° 15' 35.1''	Universiti Sains Malaysia
SU05	H. pogonognathus	Malaysia	N. Sembilan	N: 2° 54' 54''	E: 102° 15' 35.1''	Universiti Sains Malaysia
SOM01	H. pogonognathus	Malaysia	Pahang	N: 3° 56' 46.48'	E: 102° 15' 28.8''	Universiti Sains Malaysia
SOM02	H. pogonognathus	Malaysia	Pahang	N: 3° 56' 46.48'	E: 102° 15' 28.8''	Universiti Sains Malaysia
SOM03	H. pogonognathus	Malaysia	Pahang	N: 3° 56' 46.48'	E: 102° 15' 28.8''	Universiti Sains Malaysia
SOM04	H. pogonognathus	Malaysia	Pahang	N: 3° 56' 46.48'	E: 102° 15' 28.8''	Universiti Sains Malaysia
SOM05	H. pogonognathus	Malaysia	Pahang	N: 3° 56' 46.48'	E: 102° 15' 28.8''	Universiti Sains Malaysia
KS01	H. pogonognathus	Malaysia	Pahang	N: 3° 28.850'	E: 102° 57.335'	Universiti Sains Malaysia
KS02	H. pogonognathus	Malaysia	Pahang	N: 3° 28.850'	E: 102° 57.335'	Universiti Sains Malaysia
KS03	H. pogonognathus	Malaysia	Pahang	N: 3° 28.850'	E: 102° 57.335'	Universiti Sains Malaysia
KS04	H. pogonognathus	Malaysia	Pahang	N: 3° 28.850'	E: 102° 57.335'	Universiti Sains Malaysia
KS05	H. pogonognathus	Malaysia	Pahang	N: 3° 28.850'	E: 102° 57.335'	Universiti Sains Malaysia
PI01	H. pogonognathus	Malaysia	Pahang	N: 3° 1' 37.3''	E: 102° 39' 22.8''	Universiti Sains Malaysia
PI02	H. pogonognathus	Malaysia	Pahang	N: 3° 1' 37.3''	E: 102° 39' 22.8''	Universiti Sains Malaysia
PI03	H. pogonognathus	Malaysia	Pahang	N: 3° 1' 37.3''	E: 102° 39' 22.8''	Universiti Sains Malaysia
PI04	H. pogonognathus	Malaysia	Pahang	N: 3° 1' 37.3''	E: 102° 39' 22.8''	Universiti Sains Malaysia
PI05	H. pogonognathus	Malaysia	Pahang	N: 3° 1' 37.3''	E: 102° 39' 22.8''	Universiti Sains Malaysia
JP02	H. pogonognathus	Malaysia	Kelantan	N: 5° 47' 47.4''	E: 102° 20' 15.8''	Universiti Sains Malaysia
JP03	H. pogonognathus	Malaysia	Kelantan	N: 5° 47' 47.4''	E: 102° 20' 15.8''	Universiti Sains Malaysia
JP04	H. pogonognathus	Malaysia	Kelantan	N: 5° 47' 47.4''	E: 102° 20' 15.8''	Universiti Sains Malaysia
JP05	H. pogonognathus	Malaysia	Kelantan	N: 5° 47' 47.4''	E: 102° 20' 15.8''	Universiti Sains Malaysia
JP06	H. pogonognathus	Malaysia	Kelantan	N: 5° 47' 47.4''	E: 102° 20' 15.8''	Universiti Sains Malaysia
LB02	H. pogonognathus	Malaysia	Kelantan	N: 5° 38' 25.5''	E: 102° 35' 35.3''	Universiti Sains Malaysia
LB03	H. pogonognathus	Malaysia	Kelantan	N: 5° 38' 25.5''	E: 102° 35' 35.3''	Universiti Sains Malaysia
LB04	H. pogonognathus	Malaysia	Kelantan	N: 5° 38' 25.5''	E: 102° 35' 35.3''	Universiti Sains Malaysia
LB05	H. pogonognathus	Malaysia	Kelantan	N: 5° 38' 25.5''	E: 102° 35' 35.3''	Universiti Sains Malaysia
LB201	H. pogonognathus	Malaysia	Kelantan	N: 5° 38' 25.5''	E: 102° 35' 35.3''	Universiti Sains Malaysia
S01	H. pogonognathus	Malaysia	Terengganu	N: 4° 58' 7''	E: 102° 57' 21.4''	Universiti Sains Malaysia
S02	H. pogonognathus	Malaysia	Terengganu	N: 4° 58' 7''	E: 102° 57' 21.4''	Universiti Sains Malaysia
S03	H. pogonognathus	Malaysia	Terengganu	N: 4° 58' 7''	E: 102° 57' 21.4''	Universiti Sains Malaysia
S04	H. pogonognathus	Malaysia	Terengganu	N: 4° 58' 7''	E: 102° 57' 21.4''	Universiti Sains Malaysia
S05	H. pogonognathus	Malaysia	Terengganu	N: 4° 58' 7''	E: 102° 57' 21.4''	Universiti Sains Malaysia
RA01	H. pogonognathus	Malaysia	Terengganu	N: 4° 52' 50''	E: 103° 23' 5''	Universiti Sains Malaysia
RA02	H. pogonognathus	Malaysia	Terengganu	N: 4° 52' 50''	E: 103° 23' 5''	Universiti Sains Malaysia
RA204	H. pogonognathus	Malaysia	Terengganu	N: 4° 52' 50''	E: 103° 23' 5''	Universiti Sains Malaysia
RA205	H. pogonognathus	Malaysia	Terengganu	N: 4° 52' 50''	E: 103° 23' 5''	Universiti Sains Malaysia
RA206	H. pogonognathus	Malaysia	Terengganu	N: 4° 52' 50''	E: 103° 23' 5''	Universiti Sains Malaysia
PA01	H. pogonognathus	Malaysia	Terengganu	N: 4° 17' 18.0''	E: 103° 21' 0.5''	Universiti Sains Malaysia
PA02	H. pogonognathus	Malaysia	Terengganu	N: 4° 17' 18.0''	E: 103° 21' 0.5''	Universiti Sains Malaysia
PA03	H. pogonognathus	Malaysia	Terengganu	N: 4° 17' 18.0''	E: 103° 21' 0.5''	Universiti Sains Malaysia
PA04	H. pogonognathus	Malaysia	Terengganu	N: 4° 17' 18.0''	E: 103° 21' 0.5''	Universiti Sains Malaysia
PA05	H. pogonognathus	Malaysia	Terengganu	N: 4° 17' 18.0''	E: 103° 21' 0.5''	Universiti Sains Malaysia
PT02	H. pogonognathus	Malaysia	Johor	N: 1° 47' 14.7''	E: 103° 56' 33.7''	Universiti Sains Malaysia
PT03	H. pogonognathus	Malaysia	Johor	N: 1° 47' 14.7''	E: 103° 56' 33.7''	Universiti Sains Malaysia
PT04	H. pogonognathus	Malaysia	Johor	N: 1° 47' 14.7''	E: 103° 56' 33.7''	Universiti Sains Malaysia
PT05	H. pogonognathus	Malaysia	Johor	N: 1° 47' 14.7''	E: 103° 56' 33.7''	Universiti Sains Malaysia
PT06	H. pogonognathus	Malaysia	Johor	N: 1° 47' 14.7''	E: 103° 56' 33.7''	Universiti Sains Malaysia
KJ02	H. pogonognathus	Malaysia	Johor	N: 2° 15' 17.9''	E: 103° 47' 7.2''	Universiti Sains Malaysia
KJ03	H. pogonognathus	Malaysia	Johor	N: 2° 15' 17.9''	E: 103° 47' 7.2''	Universiti Sains Malaysia
KJ04	H. pogonognathus	Malaysia	Johor	N: 2° 15' 17.9''	E: 103° 47' 7.2''	Universiti Sains Malaysia
KJ05	H. pogonognathus	Malaysia	Johor	N: 2° 15' 17.9''	E: 103° 47' 7.2''	Universiti Sains Malaysia
KJ06	H. pogonognathus	Malaysia	Johor	N: 2° 15' 17.9''	E: 103° 47' 7.2''	Universiti Sains Malaysia
ST01	H. pogonognathus	Indonesia	Riau	N: 0° 25' 30''	E: 101° 21' 41''	Syiah Kuala University
ST02	H. pogonognathus	Indonesia	Riau	N: 0° 25' 30''	E: 101° 21' 41''	Syiah Kuala University
ST03	H. pogonognathus	Indonesia	Riau	N: 0° 25' 30''	E: 101° 21' 41''	Syiah Kuala University
SG01	H. pogonognathus	Indonesia	Riau	N: 0° 09' 48''	E: 101° 18' 53''	Syiah Kuala University
SG02	H. pogonognathus	Indonesia	Riau	N: 0° 09' 48''	E: 101° 18' 53''	Syiah Kuala University
SG03	H. pogonognathus	Indonesia	Riau	N: 0° 09' 48''	E: 101° 18' 53''	Syiah Kuala University
STK01	H. pogonognathus	Indonesia	Riau	N: 0° 08' 49''	E: 101° 15' 40''	Syiah Kuala University
STK02	H. pogonognathus	Indonesia	Riau	N: 0° 08' 49''	E: 101° 15' 40''	Syiah Kuala University
STK03	H. pogonognathus	Indonesia	Riau	N: 0° 08' 49''	E: 101° 15' 40''	Syiah Kuala University
SKR01	H. pogonognathus	Indonesia	Indragiri Hulu	S: 0° 13' 1''	E: 102° 14' 22''	Syiah Kuala University
SKR02	H. pogonognathus	Indonesia	Indragiri Hulu	S: 0° 13' 1''	E: 102° 14' 22''	Syiah Kuala University
SKR03	H. pogonognathus	Indonesia	Indragiri Hulu	S: 0° 13' 1''	E: 102° 14' 22''	Syiah Kuala University
SBG01	H. pogonognathus	Indonesia	Indragiri Hulu	S: 0° 22' 54''	E: 102° 23' 30''	Syiah Kuala University
SBG02	H. pogonognathus	Indonesia	Indragiri Hulu	S: 0° 22' 54''	E: 102° 23' 30''	Syiah Kuala University
SBG03	H. pogonognathus	Indonesia	Indragiri Hulu	S: 0° 22' 54''	E: 102° 23' 30''	Syiah Kuala University
JBI01	H. pogonognathus	Indonesia	Jambi	S: 1° 45' 54''	E: 103° 33' 21''	Syiah Kuala University
JBI02	H. pogonognathus	Indonesia	Jambi	S: 1° 45' 54''	E: 103° 33' 21''	Syiah Kuala University
JBI03	H. pogonognathus	Indonesia	Jambi	S: 1° 45' 54''	E: 103° 33' 21''	Syiah Kuala University
JMP01	H. pogonognathus	Indonesia	Palembang	S: 2° 15' 17''	E: 103° 48' 48''	Syiah Kuala University
JMP02	H. pogonognathus	Indonesia	Palembang	S: 2° 15' 17''	E: 103° 48' 48''	Syiah Kuala University
JMP03	H. pogonognathus	Indonesia	Palembang	S: 2° 15' 17''	E: 103° 48' 48''	Syiah Kuala University
RBT01	H. pogonognathus	Indonesia	Banga Island	S: 1° 55' 46''	E: 105° 16' 39''	Syiah Kuala University
RBT02	H. pogonognathus	Indonesia	Banga Island	S: 1° 55' 46''	E: 105° 16' 39''	Syiah Kuala University
RBT03	H. pogonognathus	Indonesia	Banga Island	S: 1° 55' 46''	E: 105° 16' 39''	Syiah Kuala University
MRW01	H. pogonognathus	Indonesia	Banga Island	S: 1° 57' 35''	E: 106° 2' 51''	Syiah Kuala University
MRW02	H. pogonognathus	Indonesia	Banga Island	S: 1° 57' 35''	E: 106° 2' 51''	Syiah Kuala University
MRW03	H. pogonognathus	Indonesia	Banga Island	S: 1° 57' 35''	E: 106° 2' 51''	Syiah Kuala University
PLG01	H. pogonognathus	Indonesia	Banga Island	S: 2° 6' 56''	E: 106° 0' 38''	Syiah Kuala University
PLG02	H. pogonognathus	Indonesia	Banga Island	S: 2° 6' 56''	E: 106° 0' 38''	Syiah Kuala University
PLG03	H. pogonognathus	Indonesia	Banga Island	S: 2° 6' 56''	E: 106° 0' 38''	Syiah Kuala University
KA01	H. pogonognathus	Indonesia	Banga Island	S: 2° 29' 29''	E: 106° 23' 30''	Syiah Kuala University
KA02	H. pogonognathus	Indonesia	Banga Island	S: 2° 29' 29''	E: 106° 23' 30''	Syiah Kuala University
SC01	H. byssus	Malaysia	Sarawak	N: 1° 40' 7.7''	E: 109° 50' 18.5''	Universiti Sains Malaysia
SC02	H. byssus	Malaysia	Sarawak	N: 1° 40' 7.7''	E: 109° 50' 18.5''	Universiti Sains Malaysia
SC03	H. byssus	Malaysia	Sarawak	N: 1° 40' 7.7''	E: 109° 50' 18.5''	Universiti Sains Malaysia
SC04	H. byssus	Malaysia	Sarawak	N: 1° 40' 7.7''	E: 109° 50' 18.5''	Universiti Sains Malaysia
SC05	H. byssus	Malaysia	Sarawak	N: 1° 40' 7.7''	E: 109° 50' 18.5''	Universiti Sains Malaysia
SST01	H. byssus	Malaysia	Sarawak	N: 1° 28' 43.8''	E: 110° 0' 8.1''	Universiti Sains Malaysia
SST03	H. byssus	Malaysia	Sarawak	N: 1° 28' 43.8''	E: 110° 0' 8.1''	Universiti Sains Malaysia
SST05	H. byssus	Malaysia	Sarawak	N: 1° 28' 43.8''	E: 110° 0' 8.1''	Universiti Sains Malaysia
SST202	H. byssus	Malaysia	Sarawak	N: 1° 28' 43.8''	E: 110° 0' 8.1''	Universiti Sains Malaysia
SST203	H. byssus	Malaysia	Sarawak	N: 1° 28' 43.8''	E: 110° 0' 8.1''	Universiti Sains Malaysia
SD01	H. byssus	Malaysia	Sarawak	N: 1° 20' 45.5''	E: 110° 2' 37.1''	Universiti Sains Malaysia
SD04	H. byssus	Malaysia	Sarawak	N: 1° 20' 45.5''	E: 110° 2' 37.1''	Universiti Sains Malaysia
SD201	H. byssus	Malaysia	Sarawak	N: 1° 20' 45.5''	E: 110° 2' 37.1''	Universiti Sains Malaysia
SD202	H. byssus	Malaysia	Sarawak	N: 1° 20' 45.5''	E: 110° 2' 37.1''	Universiti Sains Malaysia
TR02	H. byssus	Malaysia	Sarawak	N: 1° 4' 14.1''	E: 111° 17' 32.5''	Universiti Sains Malaysia
TR03	H. byssus	Malaysia	Sarawak	N: 1° 4' 14.1''	E: 111° 17' 32.5''	Universiti Sains Malaysia
TR201	H. byssus	Malaysia	Sarawak	N: 1° 4' 14.1''	E: 111° 17' 32.5''	Universiti Sains Malaysia
TR203	H. byssus	Malaysia	Sarawak	N: 1° 4' 14.1''	E: 111° 17' 32.5''	Universiti Sains Malaysia
SP01	H. byssus	Malaysia	Sarawak	N: 1° 36' 26.0''	E: 111° 34' 29.7''	Universiti Sains Malaysia
SP02	H. byssus	Malaysia	Sarawak	N: 1° 36' 26.0''	E: 111° 34' 29.7''	Universiti Sains Malaysia
SP03	H. byssus	Malaysia	Sarawak	N: 1° 36' 26.0''	E: 111° 34' 29.7''	Universiti Sains Malaysia
SP201	H. byssus	Malaysia	Sarawak	N: 1° 36' 26.0''	E: 111° 34' 29.7''	Universiti Sains Malaysia
SP203	H. byssus	Malaysia	Sarawak	N: 1° 36' 26.0''	E: 111° 34' 29.7''	Universiti Sains Malaysia
LS01	H. kuekenthali	Malaysia	Sarawak	N: 1° 58' 50.6''	E: 111° 44' 52.8''	Universiti Sains Malaysia
LS02	H. kuekenthali	Malaysia	Sarawak	N: 1° 58' 50.6''	E: 111° 44' 52.8''	Universiti Sains Malaysia
LS03	H. kuekenthali	Malaysia	Sarawak	N: 1° 58' 50.6''	E: 111° 44' 52.8''	Universiti Sains Malaysia
LS04	H. kuekenthali	Malaysia	Sarawak	N: 1° 58' 50.6''	E: 111° 44' 52.8''	Universiti Sains Malaysia
LS05	H. kuekenthali	Malaysia	Sarawak	N: 1° 58' 50.6''	E: 111° 44' 52.8''	Universiti Sains Malaysia
LG01	H. kuekenthali	Malaysia	Sarawak	N: 2° 13' 21.6''	E: 111° 48' 17.4''	Universiti Sains Malaysia
LG02	H. kuekenthali	Malaysia	Sarawak	N: 2° 13' 21.6''	E: 111° 48' 17.4''	Universiti Sains Malaysia
LG03	H. kuekenthali	Malaysia	Sarawak	N: 2° 13' 21.6''	E: 111° 48' 17.4''	Universiti Sains Malaysia
LG202	H. kuekenthali	Malaysia	Sarawak	N: 2° 13' 21.6''	E: 111° 48' 17.4''	Universiti Sains Malaysia
BK01	H. kuekenthali	Malaysia	Sarawak	N: 2° 19' 37.5''	E: 111° 57' 25.9''	Universiti Sains Malaysia
BK02	H. kuekenthali	Malaysia	Sarawak	N: 2° 19' 37.5''	E: 111° 57' 25.9''	Universiti Sains Malaysia
BK03	H. kuekenthali	Malaysia	Sarawak	N: 2° 19' 37.5''	E: 111° 57' 25.9''	Universiti Sains Malaysia
BK04	H. kuekenthali	Malaysia	Sarawak	N: 2° 19' 37.5''	E: 111° 57' 25.9''	Universiti Sains Malaysia
BK05	H. kuekenthali	Malaysia	Sarawak	N: 2° 19' 37.5''	E: 111° 57' 25.9''	Universiti Sains Malaysia
MK01	H. kuekenthali	Malaysia	Sarawak	N: 2° 54' 29.7''	E: 112° 19' 33.5''	Universiti Sains Malaysia
MK02	H. kuekenthali	Malaysia	Sarawak	N: 2° 54' 29.7''	E: 112° 19' 33.5''	Universiti Sains Malaysia
MK03	H. kuekenthali	Malaysia	Sarawak	N: 2° 54' 29.7''	E: 112° 19' 33.5''	Universiti Sains Malaysia
MK04	H. kuekenthali	Malaysia	Sarawak	N: 2° 54' 29.7''	E: 112° 19' 33.5''	Universiti Sains Malaysia
MK05	H. kuekenthali	Malaysia	Sarawak	N: 2° 54' 29.7''	E: 112° 19' 33.5''	Universiti Sains Malaysia
TT01	H. kuekenthali	Malaysia	Sarawak	N: 2° 41' 7.9''	E: 112° 40' 30.3''	Universiti Sains Malaysia
TT02	H. kuekenthali	Malaysia	Sarawak	N: 2° 41' 7.9''	E: 112° 40' 30.3''	Universiti Sains Malaysia
TT03	H. kuekenthali	Malaysia	Sarawak	N: 2° 41' 7.9''	E: 112° 40' 30.3''	Universiti Sains Malaysia
TT04	H. kuekenthali	Malaysia	Sarawak	N: 2° 41' 7.9''	E: 112° 40' 30.3''	Universiti Sains Malaysia
TT05	H. kuekenthali	Malaysia	Sarawak	N: 2° 41' 7.9''	E: 112° 40' 30.3''	Universiti Sains Malaysia
KMD01	H. kuekenthali	Malaysia	Sarawak	N: 3° 19' 30.7''	E: 113° 28' 14.1''	Universiti Sains Malaysia
KMD02	H. kuekenthali	Malaysia	Sarawak	N: 3° 19' 30.7''	E: 113° 28' 14.1''	Universiti Sains Malaysia
KMD03	H. kuekenthali	Malaysia	Sarawak	N: 3° 19' 30.7''	E: 113° 28' 14.1''	Universiti Sains Malaysia
KMD04	H. kuekenthali	Malaysia	Sarawak	N: 3° 19' 30.7''	E: 113° 28' 14.1''	Universiti Sains Malaysia
KMD05	H. kuekenthali	Malaysia	Sarawak	N: 3° 19' 30.7''	E: 113° 28' 14.1''	Universiti Sains Malaysia
LK01	H. kuekenthali	Malaysia	Sarawak	N: 4° 14' 19''	E: 114° 3' 43''	Universiti Sains Malaysia
LK02	H. kuekenthali	Malaysia	Sarawak	N: 4° 14' 19''	E: 114° 3' 43''	Universiti Sains Malaysia
LK04	H. kuekenthali	Malaysia	Sarawak	N: 4° 14' 19''	E: 114° 3' 43''	Universiti Sains Malaysia
LL01	H. kuekenthali	Malaysia	Sarawak	N: 3° 46' 9.1''	E: 114° 25' 28.3''	Universiti Sains Malaysia
LL02	H. kuekenthali	Malaysia	Sarawak	N: 3° 46' 9.1''	E: 114° 25' 28.3''	Universiti Sains Malaysia
LL03	H. kuekenthali	Malaysia	Sarawak	N: 3° 46' 9.1''	E: 114° 25' 28.3''	Universiti Sains Malaysia
LL04	H. kuekenthali	Malaysia	Sarawak	N: 3° 46' 9.1''	E: 114° 25' 28.3''	Universiti Sains Malaysia
LL05	H. kuekenthali	Malaysia	Sarawak	N: 3° 46' 9.1''	E: 114° 25' 28.3''	Universiti Sains Malaysia
KJI01	H. kuekenthali	Malaysia	Sarawak	N: 3° 41' 32.8''	E: 114° 27' 20.8''	Universiti Sains Malaysia
KJI02	H. kuekenthali	Malaysia	Sarawak	N: 3° 41' 32.8''	E: 114° 27' 20.8''	Universiti Sains Malaysia
KJI03	H. kuekenthali	Malaysia	Sarawak	N: 3° 41' 32.8''	E: 114° 27' 20.8''	Universiti Sains Malaysia
KJI04	H. kuekenthali	Malaysia	Sarawak	N: 3° 41' 32.8''	E: 114° 27' 20.8''	Universiti Sains Malaysia
KJI05	H. kuekenthali	Malaysia	Sarawak	N: 3° 41' 32.8''	E: 114° 27' 20.8''	Universiti Sains Malaysia
LBI02	H. kuekenthali	Malaysia	Sarawak	N: 4° 10' 03.2'	E: 114° 27' 53.1''	Universiti Sains Malaysia
LBI03	H. kuekenthali	Malaysia	Sarawak	N: 4° 10' 03.2'	E: 114° 27' 53.1''	Universiti Sains Malaysia
LBI04	H. kuekenthali	Malaysia	Sarawak	N: 4° 10' 03.2'	E: 114° 27' 53.1''	Universiti Sains Malaysia
LBI05	H. kuekenthali	Malaysia	Sarawak	N: 4° 10' 03.2'	E: 114° 27' 53.1''	Universiti Sains Malaysia
LMB01	H. kuekenthali	Malaysia	Sarawak	N: 4° 43' 13.3''	E: 114° 59' 47.1''	Universiti Sains Malaysia
LMB02	H. kuekenthali	Malaysia	Sarawak	N: 4° 43' 13.3''	E: 114° 59' 47.1''	Universiti Sains Malaysia
LMB03	H. kuekenthali	Malaysia	Sarawak	N: 4° 43' 13.3''	E: 114° 59' 47.1''	Universiti Sains Malaysia
LMB04	H. kuekenthali	Malaysia	Sarawak	N: 4° 43' 13.3''	E: 114° 59' 47.1''	Universiti Sains Malaysia
LMB05	H. kuekenthali	Malaysia	Sarawak	N: 4° 43' 13.3''	E: 114° 59' 47.1''	Universiti Sains Malaysia
